# Supplementary material for: An Acylhydrazone-Based Fluorescent Sensor for Sequential Recognition of Al3+ and H2PO4−
Source: MDPI journal article supplement (doi:10.3390/ma14216392), 2021-10-25
Supplement: s1 [file materials-1412610-supplementary.pdf › materials-1412610-supplementary.pdf]

**Supplementary Materials**

**An Acylhydrazone-Based Fluorescent Sensor for  
Sequential Recognition of  $\text{Al}^{3+}$  and  $\text{H}_2\text{PO}_4^-$**

**Donghwan Choe and Cheal Kim \***

Department of Fine Chem., Seoul National University of Science and Technology (SNUT),  
Seoul 136-742, Korea; ehdghksdl\_@naver.com

\* Correspondence: chealkim@snut.ac.kr; Tel.: +82-2-972-6673; Fax: +82-2-981-9147

**Table S1.** Examples of chemosensors for successive detection related to  $\text{Al}^{3+}$  or  $\text{H}_2\text{PO}_4^-$  or both.

| Structure | Analytes                                                              | Detection limit for $\text{Al}^{3+}$                                                               | Detection limit for $\text{H}_2\text{PO}_4^-$ | Solvent                                   | Reference |
|-----------|-----------------------------------------------------------------------|----------------------------------------------------------------------------------------------------|-----------------------------------------------|-------------------------------------------|-----------|
|           | $\text{Al}^{3+}$ , $\text{PPi}$                                       | $1.6 \times 10^{-7} \text{ M}$                                                                     | -                                             | DMSO/HEPES<br>(v/v = 4:1,<br>pH = 7.4)    | [1]       |
|           | $\text{Al}^{3+}$ , $\text{F}^-$                                       | $4.2 \times 10^{-7} \text{ M}$ ( $\text{R}_1$ )<br>$1.5 \times 10^{-7} \text{ M}$ ( $\text{R}_2$ ) | -                                             | DMSO/ $\text{H}_2\text{O}$<br>(v/v = 1:2) | [2]       |
|           | $\text{Al}^{3+}$ , $\text{ClO}^-$                                     | $2.0 \times 10^{-8} \text{ M}$                                                                     | -                                             | MeOH                                      | [3]       |
|           | $\text{Al}^{3+}$ , $\text{PO}_4^{3-}$                                 | $3.8 \times 10^{-9} \text{ M}$                                                                     | -                                             | Water                                     | [4]       |
|           | $\text{Fe}^{3+}$ ,<br>$\text{H}_2\text{PO}_4^-$                       | -                                                                                                  | $5.3 \times 10^{-6} \text{ M}$                | Water                                     | [5]       |
|           | $\text{Cu}^{2+}$ ,<br>$\text{H}_2\text{PO}_4^-$                       | -                                                                                                  | $1.6 \times 10^{-6} \text{ M}$                | MeCN/HEPES<br>(v/v = 9:1,<br>pH = 7.3)    | [6]       |
|           | $\text{Zn}^{2+}$ ,<br>$\text{H}_2\text{PO}_4^-$                       | -                                                                                                  | $2.6 \times 10^{-5} \text{ M}$                | MeOH/HEPES<br>(v:v = 4:1<br>pH = 7.2)     | [7]       |
|           | $\text{Al}^{3+}$ ,<br>$\text{H}_2\text{PO}_4^-$ ,<br>$\text{HSO}_4^-$ | $1.5 \times 10^{-9} \text{ M}$                                                                     | $2.3 \times 10^{-7} \text{ M}$                | Water                                     | [8]       |
|           | $\text{Al}^{3+}$ ,<br>$\text{H}_2\text{PO}_4^-$                       | $8.3 \times 10^{-7} \text{ M}$                                                                     | $1.7 \times 10^{-6} \text{ M}$                | MeOH                                      | This work |

## References

1. Li, S.; Cao, D.; Meng, X.; Hu, Z.; Li, Z.; Yuan, C.; Zhou, T.; Han, X.; Ma, W. A novel schiff base fluorescent probe based on coumarin and benzothiazole for sequential detection of  $\text{Al}^{3+}$  and  $\text{PPI}$  and its applicability in live cell imaging. *J. Photochem. Photobiol. A Chem.* **2020**, 392, 112427, doi:10.1016/j.jphotochem.2020.112427.
2. Fu, J.; Li, B.; Mei, H.; Chang, Y.; Xu, K. Fluorescent schiff base probes for sequential detection of  $\text{Al}^{3+}$  and  $\text{F}^-$  and cell imaging applications. *Spectrochim. Acta Part A Mol. Biomol. Spectrosc.* **2020**, 227, 117678, doi:10.1016/j.saa.2019.117678.
3. Sun, X.J.; Liu, T.T.; Fu, H.; Li, N.N.; Xing, Z.Y.; Yang, F. A Naphthalimide-Based Fluorescence “Off-on-Off” Chemosensor for Relay Detection of  $\text{Al}^{3+}$  and  $\text{ClO}^-$ . *Front. Chem.* **2019**, 7, 549, doi:10.3389/fchem.2019.00549.
4. Huang, M.X.; Lai, J.P.; Sun, H.; Wu, W.Z. A simple, highly selective and ultra-sensitive “off-on-off” fluorescent chemosensor for successive detection of aluminum ion and phosphate in water samples. *Microchem. J.* **2019**, 151, 104195, doi:10.1016/j.microc.2019.104195.
5. Zhang, Y.M.; Chen, X.P.; Liang, G.Y.; Zhong, K.P.; Yao, H.; Wei, T.B.; Lin, Q. A water-soluble fluorescent chemosensor based on Asp functionalized naphthalimide for successive detection  $\text{Fe}^{3+}$  and  $\text{H}_2\text{PO}_4^-$ . *Can. J. Chem.* **2018**, 96, 363–370, doi:10.1139/cjc-2017-0451.
6. Meng, X.; Li, S.; Ma, W.; Wang, J.; Hu, Z.; Cao, D. Highly sensitive and selective chemosensor for  $\text{Cu}^{2+}$  and  $\text{H}_2\text{PO}_4^-$  based on coumarin fluorophore. *Dyes and Pigments* **2018**, 154, 194–198, doi:10.1016/j.dyepig.2018.03.002.
7. Purkait, R.; Mahapatra, A. Das; Chattopadhyay, D.; Sinha, C. An azine-based carbothioamide chemosensor for selective and sensitive turn-on-off sequential detection of  $\text{Zn(II)}$  and  $\text{H}_2\text{PO}_4^-$ , live cell imaging and INHIBIT logic gate. *Spectrochim. Acta Part A Mol. Biomol. Spectrosc.* **2019**, 207, 164–172, doi:10.1016/j.saa.2018.09.019.
8. Kumar, A.; Kumar, V.; Upadhyay, K.K. An  $\text{Al}^{3+}$  and  $\text{H}_2\text{PO}_4^-/\text{HSO}_4^-$  selective conformational arrest and bail to a pyrimidine-naphthalene anchored molecular switch. *Analyst* **2013**, 138, 1891–1897, doi:10.1039/C3AN36697A.

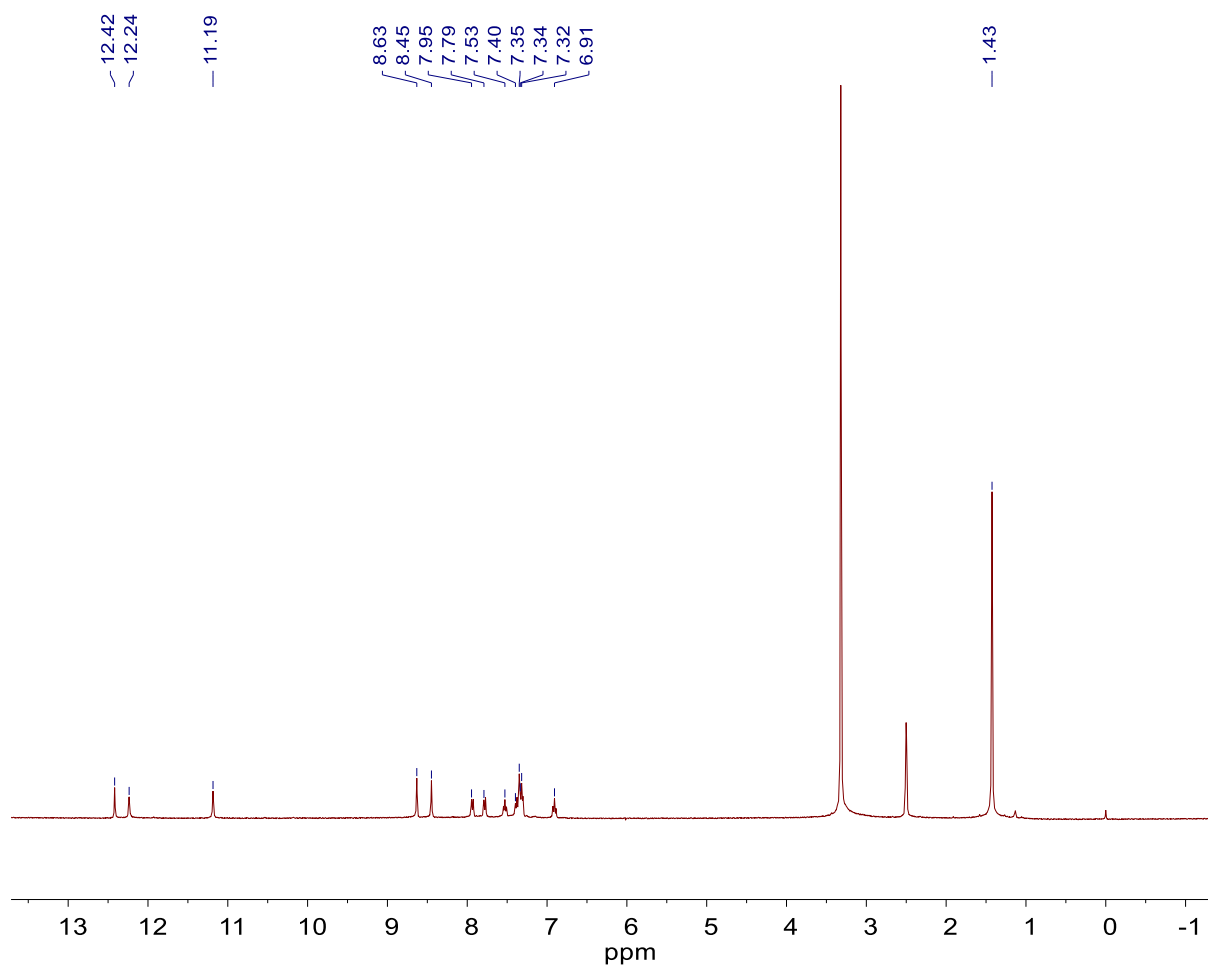

**Figure S1.** <sup>1</sup>H NMR spectrum of **NATB** in DMSO-*d*<sub>6</sub>.

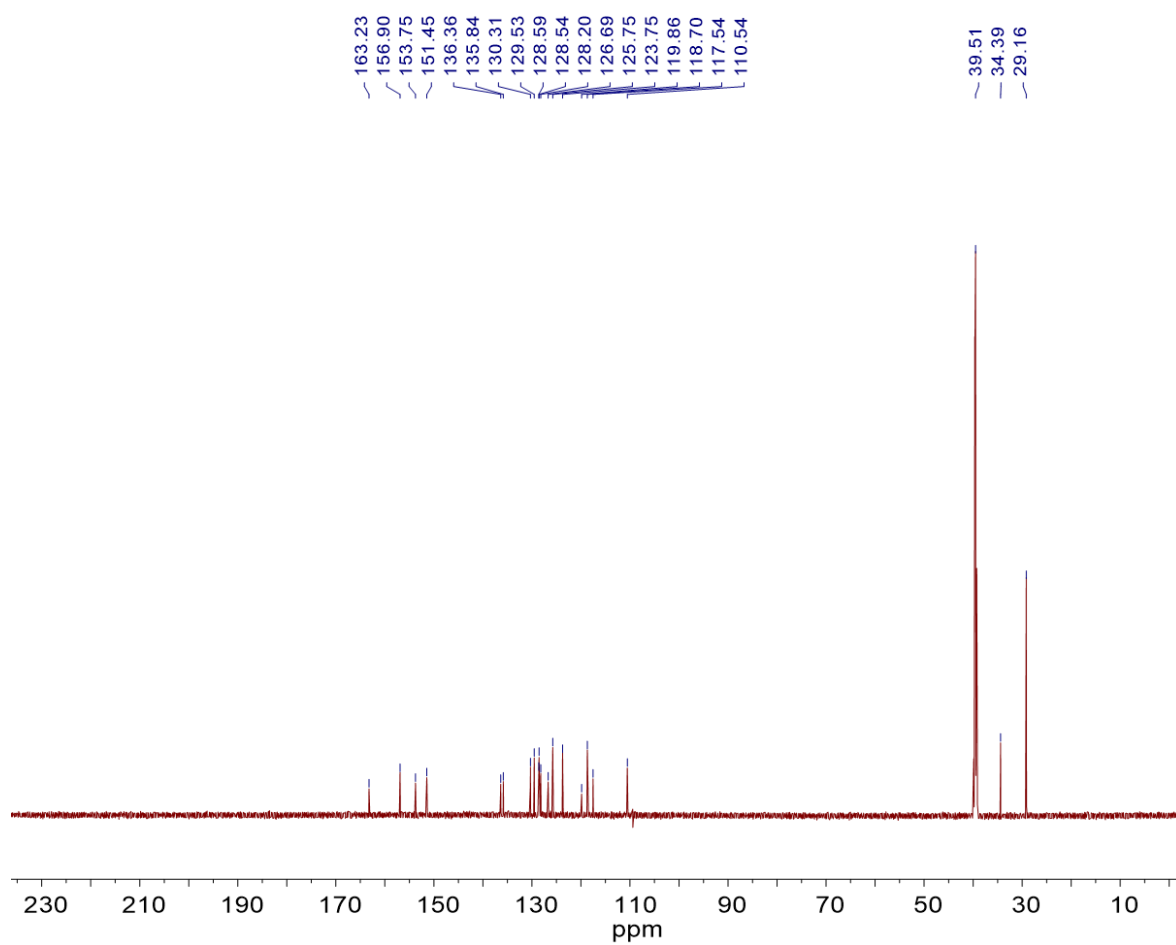

**Figure S2.**  $^{13}\text{C}$  NMR spectrum of NATB in  $\text{DMSO-}d_6$ .

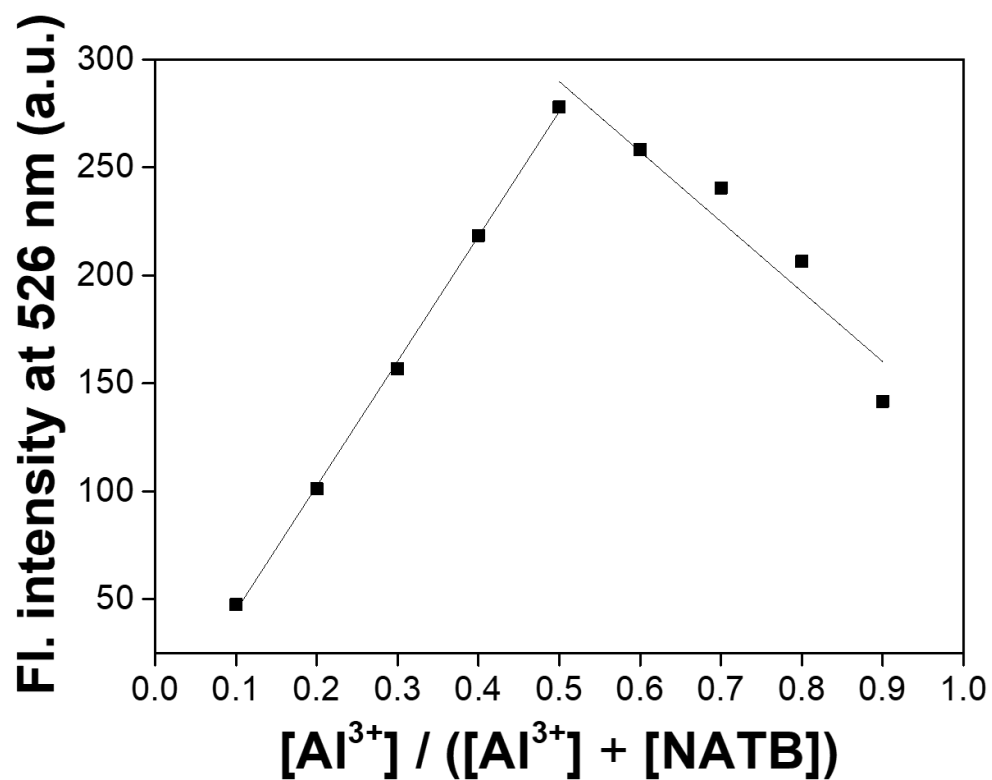

**Figure S3.** Job plot for the binding of NATB with  $\text{Al}^{3+}$  (50  $\mu\text{M}$ ) in MeOH. Fluorescence intensity at 526 nm was plotted as a function of the molar ratio of  $[\text{Al}^{3+}] / ([\text{Al}^{3+}] + [\text{NATB}])$ .

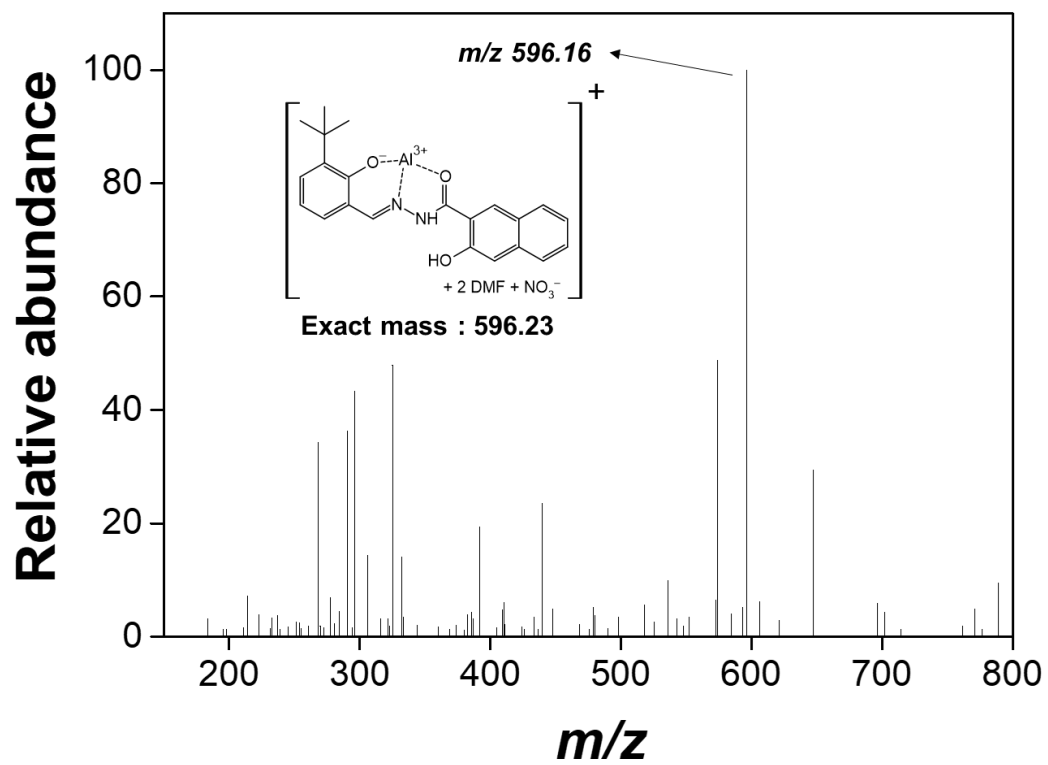

**Figure S4.** Positive-ion ESI-mass spectrum of NATB (100  $\mu\text{M}$ ) in MeOH upon the addition of 1 equiv of  $\text{Al}^{3+}$  in DMF.

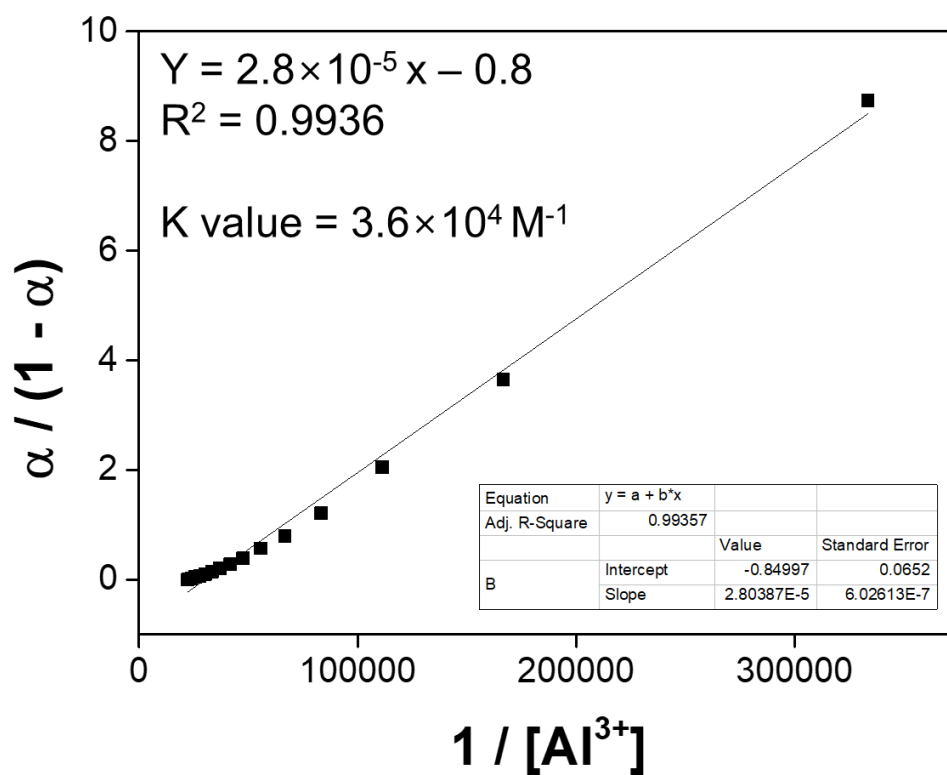

**Figure S5.** Li's equation plot (at 526 nm) of **NATB** (30  $\mu\text{M}$ ) in MeOH, based on fluorescence titration, assuming 1:1 stoichiometry for the association between **NATB** and  $\text{Al}^{3+}$ .



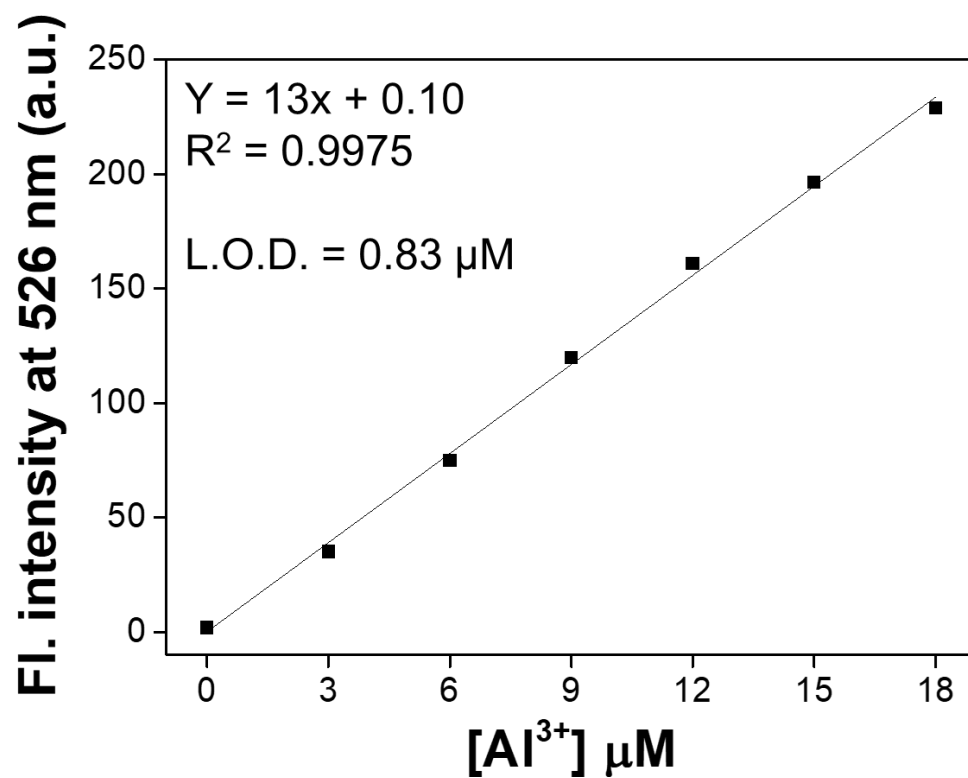

**Figure S6.** Calibration curve of **NATB** as a function of  $\text{Al}^{3+}$  concentration in MeOH.  $[\text{NATB}] = 30 \mu\text{M}$  and  $[\text{Al}^{3+}] = 0 - 18 \mu\text{M}$  ( $\lambda_{\text{ex}} = 358 \text{ nm}$ ).

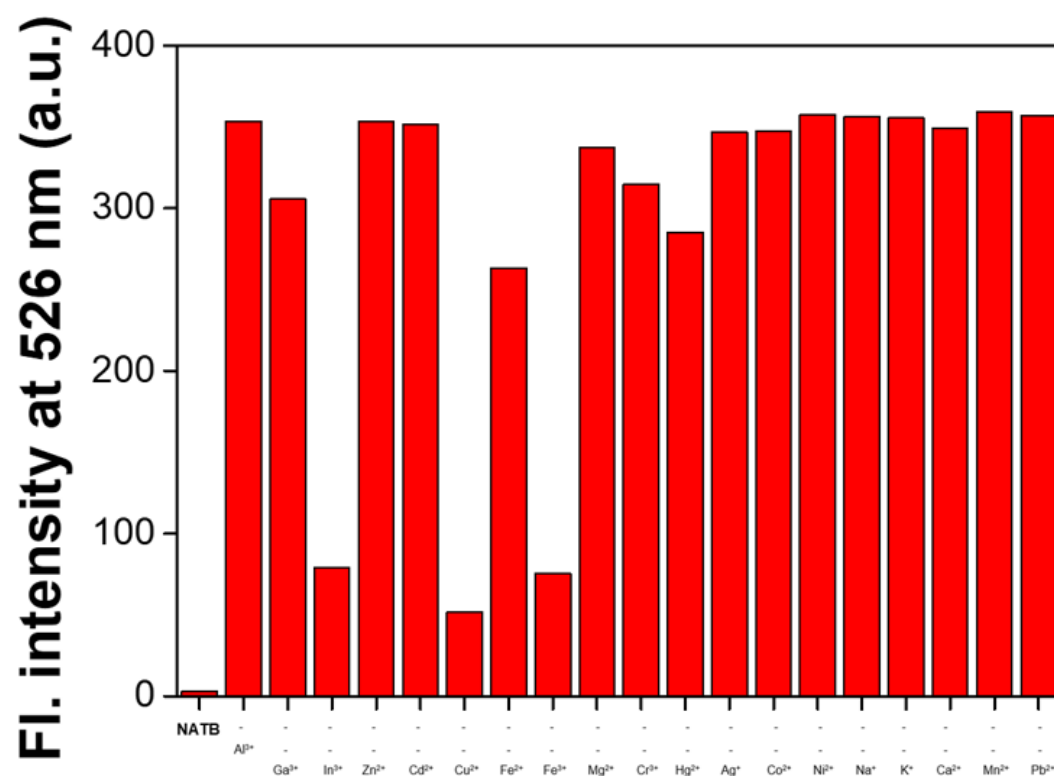

**Figure S7.** Competitive experiments of **NATB** (30  $\mu\text{M}$ ) toward  $\text{Al}^{3+}$  (45  $\mu\text{M}$ ) in the presence of other metal ions (45  $\mu\text{M}$ ,  $\lambda_{\text{ex}} = 358 \text{ nm}$ ) in MeOH.

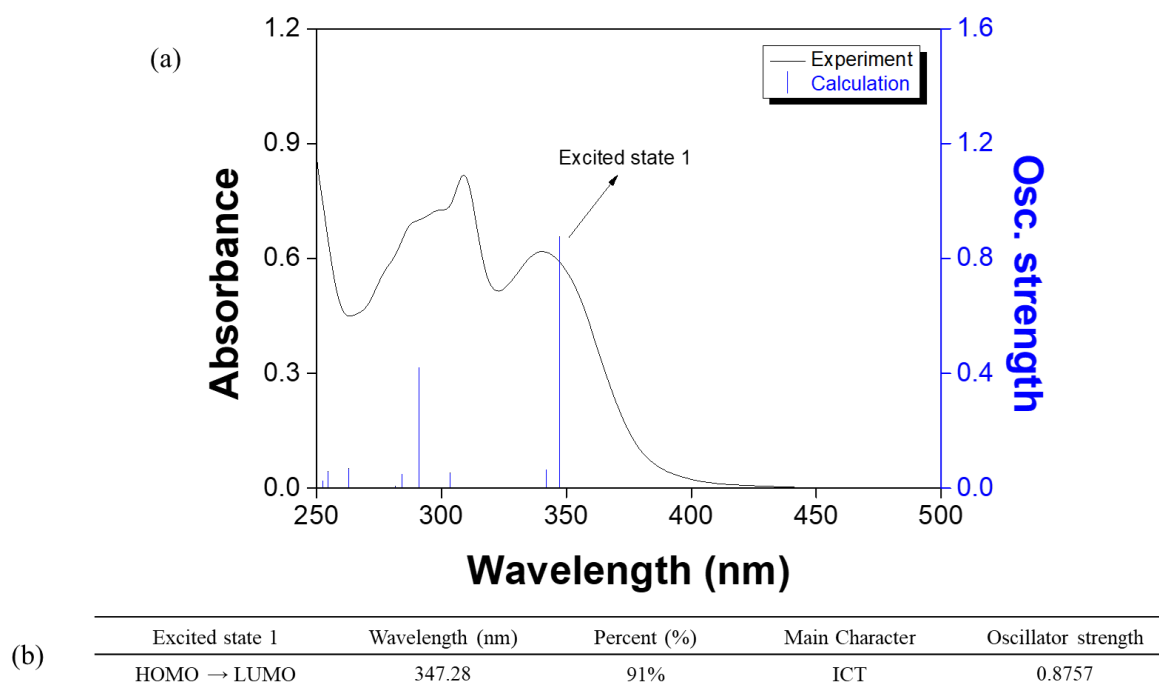

**Figure S8.** (a) The theoretical excitation energies and the experimental UV-vis spectrum of NATB. (b) The major electronic transition energies and molecular orbital contributions of NATB.

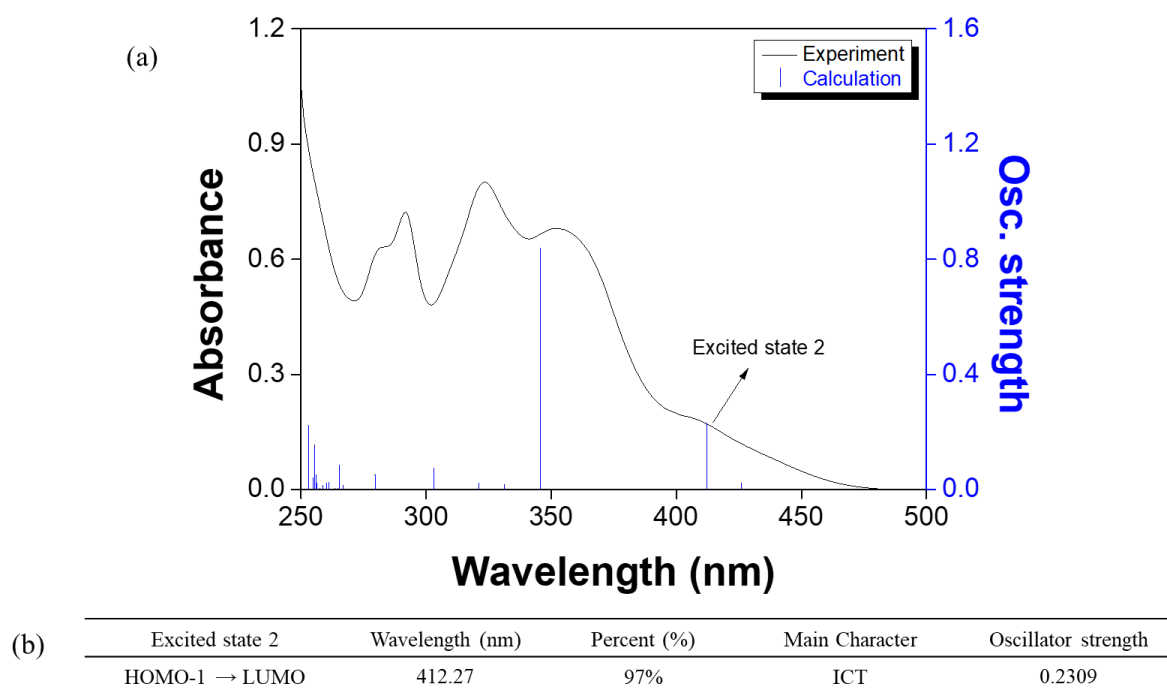

**Figure S9.** (a) The theoretical excitation energies and the experimental UV-vis spectrum of **NATB-Al<sup>3+</sup>**. (b) The major electronic transition energies and molecular orbital contributions of **NATB-Al<sup>3+</sup>**.

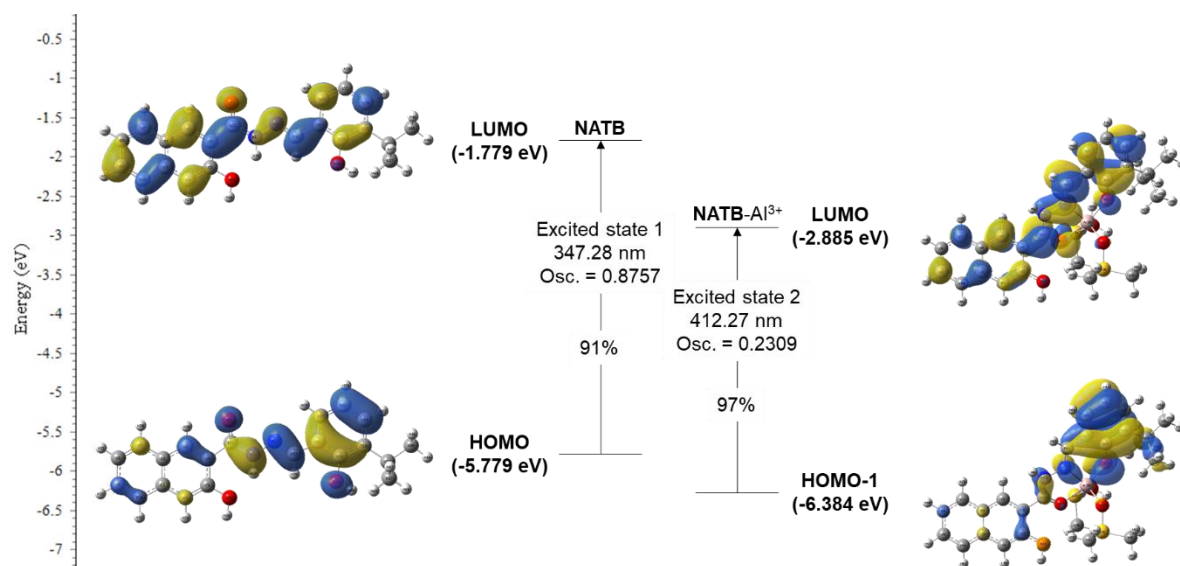

**Figure S10.** The major molecular orbital transitions and excitation energies of NATB and NATB-Al<sup>3+</sup>.

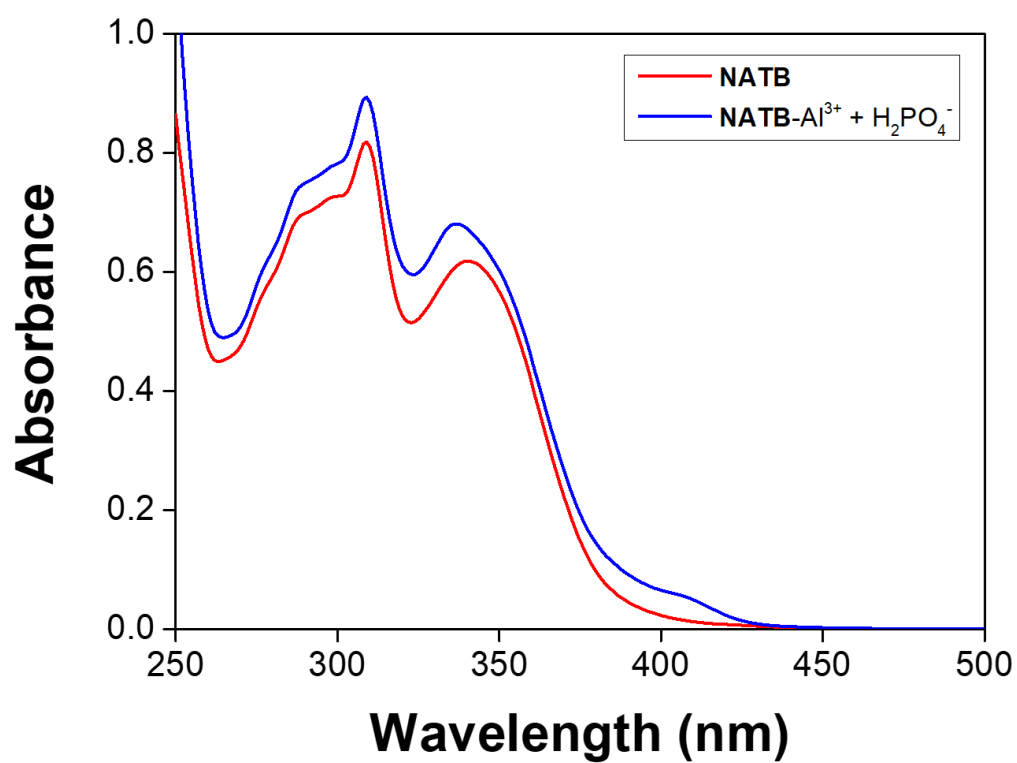

**Figure S11.** UV-vis spectra of NATB and NATB-Al<sup>3+</sup> with H<sub>2</sub>PO<sub>4</sub><sup>-</sup> in MeOH, respectively.

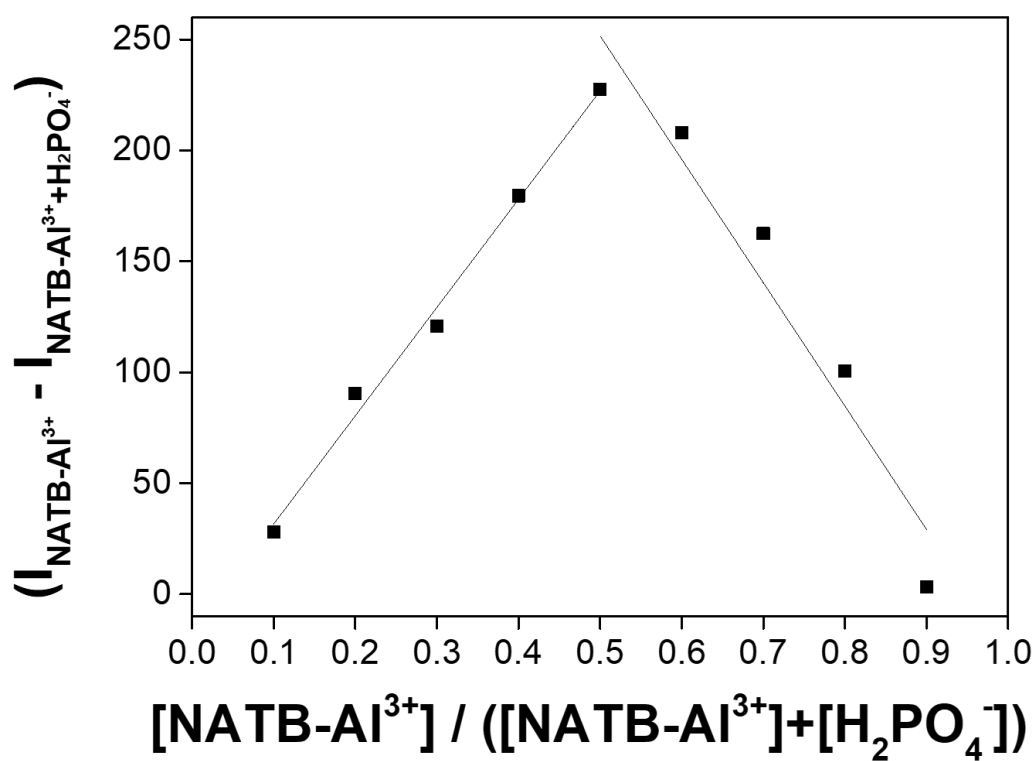

**Figure S12.** Job plot for the stoichiometry of **NATB-Al<sup>3+</sup>** with **H<sub>2</sub>PO<sub>4</sub><sup>-</sup>** (30  $\mu$ M) in MeOH. Fluorescence intensity at 526 nm was plotted as a function of the molar ratio of **[NATB-Al<sup>3+</sup>]** / (**[NATB-Al<sup>3+</sup>]** + **[H<sub>2</sub>PO<sub>4</sub><sup>-</sup>]**).

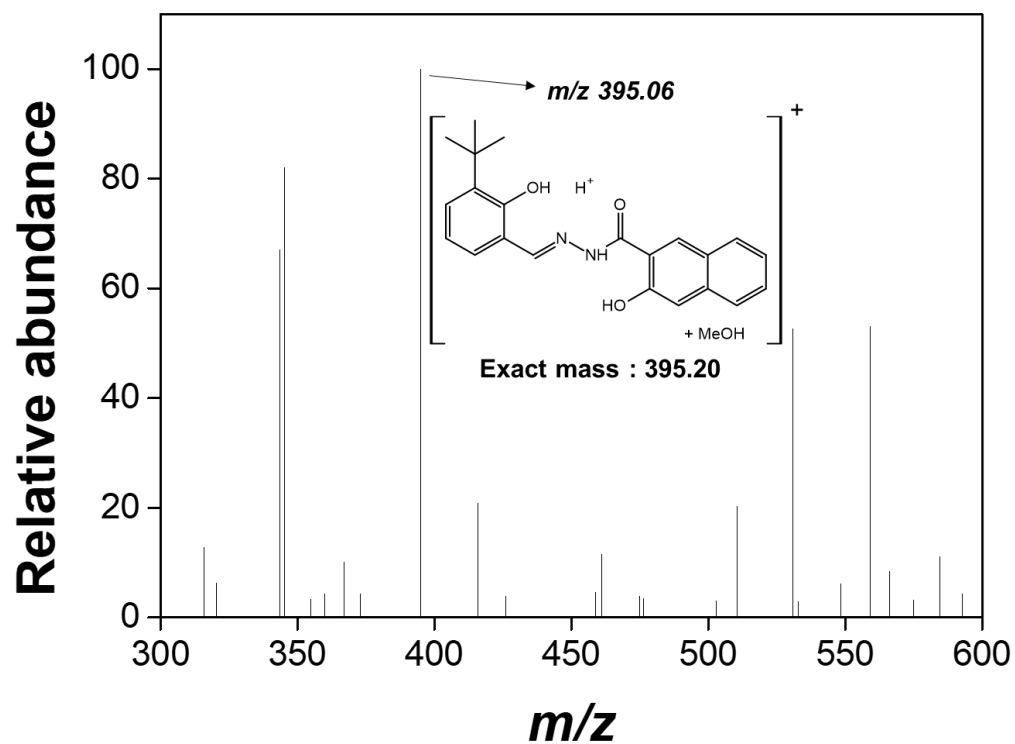

**Figure S13.** Positive-ion ESI-mass spectrum of NATB-Al<sup>3+</sup> (100 μM) in MeOH upon the addition of 1 equiv of H<sub>2</sub>PO<sub>4</sub><sup>-</sup> in H<sub>2</sub>O.



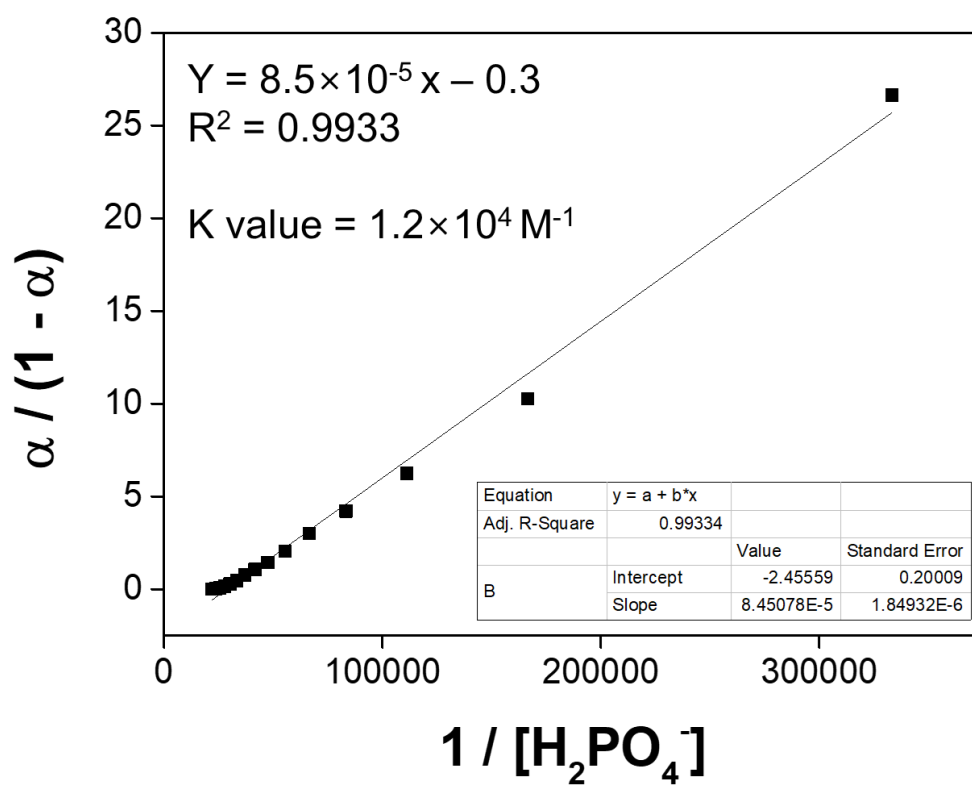

**Figure S14.** Li's equation plot (at 526 nm) of **NATB**- $\text{Al}^{3+}$  (30  $\mu\text{M}$ ) based on fluorescence titration in MeOH, assuming 1:1 stoichiometry for the association between **NATB**- $\text{Al}^{3+}$  and  $\text{H}_2\text{PO}_4^-$ .

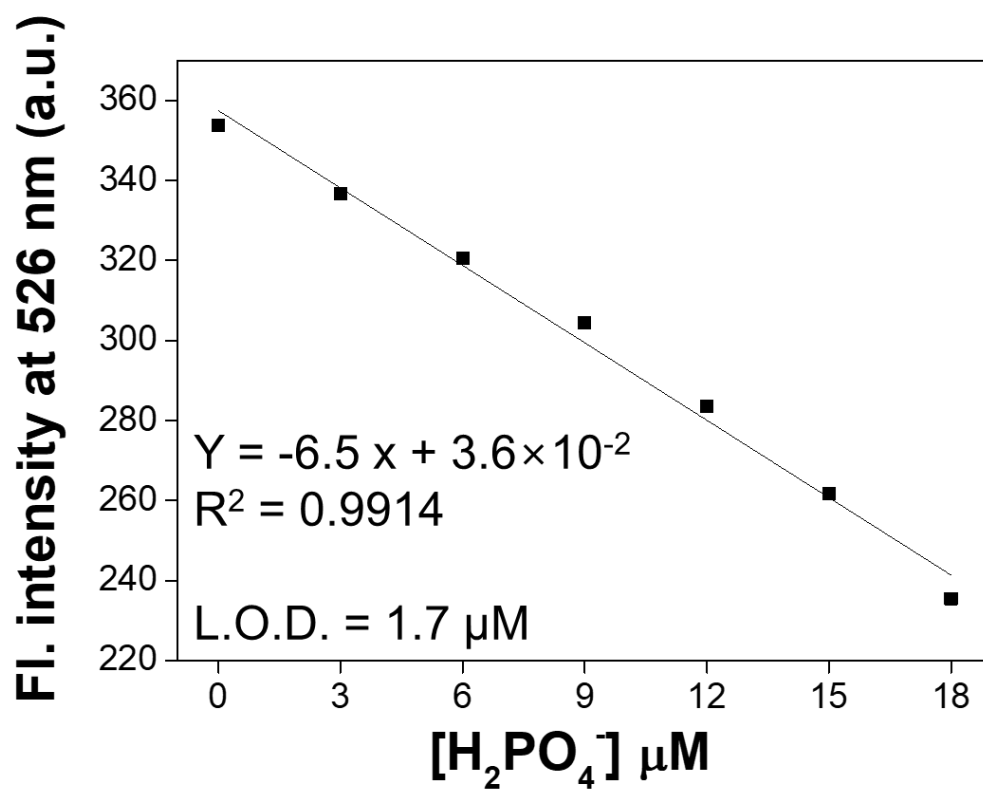

**Figure S15.** Calibration curve of NATB- $\text{Al}^{3+}$  in MeOH as a function of  $\text{H}_2\text{PO}_4^-$  concentration.  $[\text{NATB-Al}^{3+}] = 30 \mu\text{M}$  and  $[\text{H}_2\text{PO}_4^-] = 0.0 - 18.0 \mu\text{M}$  ( $\lambda_{\text{ex}} = 358 \text{ nm}$ ).

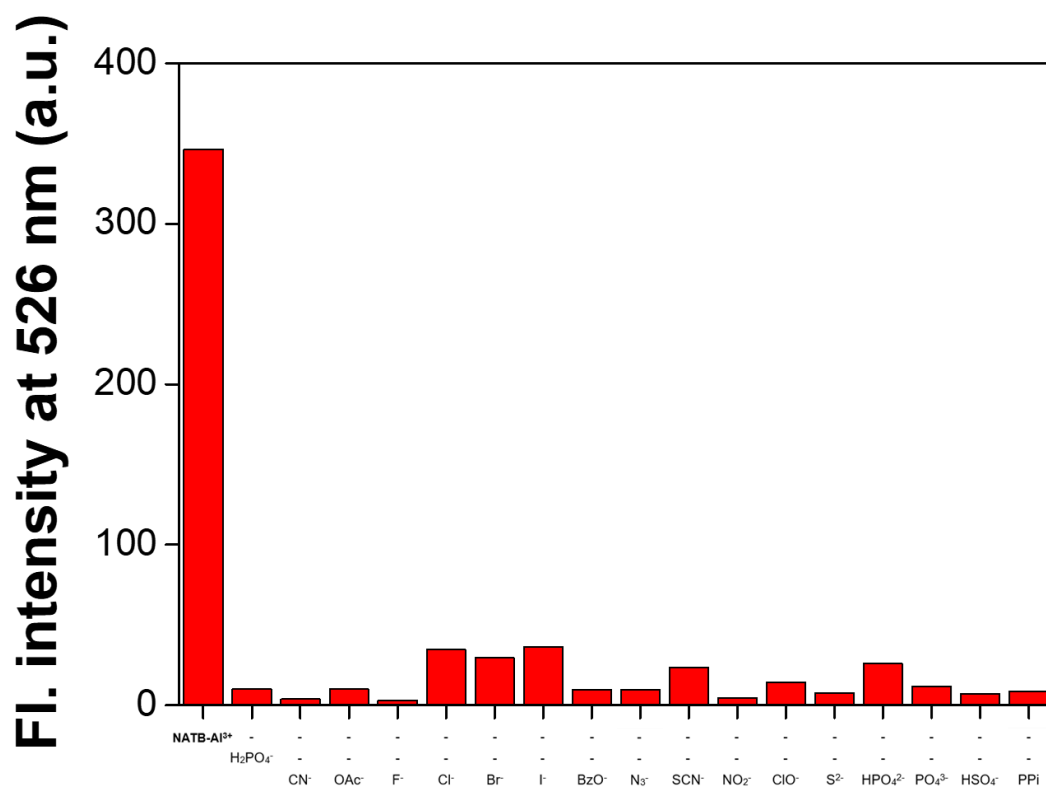

**Figure S16.** Interference studies of **NATB-Al<sup>3+</sup>** (30  $\mu$ M) toward **H<sub>2</sub>PO<sub>4</sub><sup>-</sup>** (45  $\mu$ M) in the presence of other anions (45  $\mu$ M,  $\lambda_{\text{ex}}$  = 358 nm) in MeOH.
